# Supplementary material for: Metabolomic signatures of the steroid biosynthesis driving sex differences in clinical asthma subtypes
Source: Research Square preprint supplement (doi:10.21203/rs.3.rs-9696323/v1), 2026-06-04
Supplement: Supplementary file 1 [file 08b40c6ba51ba4a3ca8e3b93.docx]

**Metabolomic signatures of the steroid biosynthesis driving sex differences in clinical asthma subtypes**

**Authors:** Gbenga Dairo1,2, Rinku Sharma3, Rachel S. Kelly3, Kevin Mendez3, Michael J McGeachie3, Scott T. Weiss3, Jessica Lasky-Su3#, Priyadarshini Kachroo2#

1Institute of Quantitative Biomedicine, Rutgers-The State University of New Jersey, New Brunswick, United States

2Department of Health Informatics, Rutgers School of Health Professions, Rutgers-The State University of New Jersey, Newark, United States

3Channing Division of Network Medicine, Department of Medicine, Brigham and Women’s Hospital and Harvard Medical School, Boston, Massachusetts, United States

**Pre-and Post-Puberty Classification**

The pubertal stage was approximated using age-based cutoffs informed by developmental literature (Cleveland Clinic, 2024). For females, prepuberty was defined as age <7 years and postpuberty as age >10 years at randomization; ages 8–9.99 years were excluded to minimize misclassification during the transitional phase. For males, corresponding cutoffs were <8 years (prepuberty) and >12 years (postpuberty), with ages 9–11 years excluded. These thresholds were selected to maximize the likelihood that participants would remain within the same pubertal category across the 4-year follow-up period. Although this approach was highly stable among males, a small proportion of females who were classified as prepubertal at randomization reached peak pubertal age by Year 4. Notwithstanding, we retained subjects in their randomization-defined stratum to preserve randomization-based classification and avoid post hoc selection bias. This strategy is conservative and may reduce statistical power in certain strata, but ensures consistent stratification anchored to baseline characteristics.

**Supplementary Table 1:** Characteristics by treatment status for all sex–puberty strata.

| **Group** | **Variable** | **Overall** | **No ICS** | **ICS** |
| --- | --- | --- | --- | --- |
| Male Pre-Puberty (Baseline) | N | 139 | 115 | 24 |
| Age, mean ± SD (years) | 6.6 ± 0.8 | 6.6 ± 0.8 | 6.5 ± 0.8 |
| BMI, mean ± SD (kg/m²) | 16.7 ± 2.3 | 16.5 ± 2.3 | 17.3 ± 2.2 |
| Sex, n (%) | Male: 139 (100.0%) | Male: 115 (100.0%) | Male: 24 (100.0%) |
| Race/Ethnicity, n (%) | African American: 14 (10.1%); Hispanic: 12 (8.6%); Other: 11 (7.9%); White: 102 (73.4%) | African American: 12 (10.4%); Hispanic: 9 (7.8%); Other: 7 (6.1%); White: 87 (75.7%) | African American: 2 (8.3%); Hispanic: 3 (12.5%); Other: 4 (16.7%); White: 15 (62.5%) |
| Male Pre-Puberty (Year 4) | N | 141 | 117 | 24 |
| Age, mean ± SD (years) | 6.6 ± 0.8 | 6.6 ± 0.8 | 6.6 ± 0.8 |
| BMI, mean ± SD (kg/m²) | 19.4 ± 3.8 | 19.3 ± 3.8 | 20.3 ± 3.7 |
| Sex, n (%) | Male: 141 (100.0%) | Male: 117 (100.0%) | Male: 24 (100.0%) |
| Race/Ethnicity, n (%) | African American: 14 (9.9%); Hispanic: 12 (8.5%); Other: 10 (7.1%); White: 105 (74.5%) | African American: 12 (10.3%); Hispanic: 9 (7.7%); Other: 7 (6.0%); White: 89 (76.1%) | African American: 2 (8.3%); Hispanic: 3 (12.5%); Other: 3 (12.5%); White: 16 (66.7%) |
| Male Post-Puberty (Baseline) | N | 41 | 33 | 8 |
| Age, mean ± SD (years) | 12.6 ± 0.3 | 12.6 ± 0.3 | 12.4 ± 0.4 |
| BMI, mean ± SD (kg/m²) | 20.6 ± 3.4 | 20.0 ± 3.2 | 23.0 ± 3.3 |
| Sex, n (%) | Male: 41 (100.0%) | Male: 33 (100.0%) | Male: 8 (100.0%) |
| Race/Ethnicity, n (%) | African American: 5 (12.2%); Hispanic: 9 (22.0%); Other: 4 (9.8%); White: 23 (56.1%) | African American: 4 (12.1%); Hispanic: 4 (12.1%); Other: 3 (9.1%); White: 22 (66.7%) | African American: 1 (12.5%); Hispanic: 5 (62.5%); Other: 1 (12.5%); White: 1 (12.5%) |
| Male Post-Puberty (Year 4) | N | 41 | 33 | 8 |
| Age, mean ± SD (years) | 12.6 ± 0.3 | 12.6 ± 0.3 | 12.5 ± 0.4 |
| BMI, mean ± SD (kg/m²) | 22.6 ± 3.3 | 22.2 ± 3.1 | 24.4 ± 3.5 |
| Sex, n (%) | Male: 41 (100.0%) | Male: 33 (100.0%) | Male: 8 (100.0%) |
| Race/Ethnicity, n (%) | African American: 4 (9.8%); Hispanic: 9 (22.0%); Other: 4 (9.8%); White: 24 (58.5%) | African American: 3 (9.1%); Hispanic: 4 (12.1%); Other: 4 (12.1%); White: 22 (66.7%) | African American: 1 (12.5%); Hispanic: 5 (62.5%); White: 2 (25.0%) |
| Female Pre-Puberty (Baseline) | N | 52 | 46 | 6 |
| Age, mean ± SD (years) | 6.1 ± 0.5 | 6.1 ± 0.5 | 6.3 ± 0.6 |
| BMI, mean ± SD (kg/m²) | 16.5 ± 2.5 | 16.5 ± 2.6 | 16.9 ± 0.9 |
| Sex, n (%) | Female: 52 (100.0%) | Female: 46 (100.0%) | Female: 6 (100.0%) |
| Race/Ethnicity, n (%) | African American: 10 (19.2%); Hispanic: 1 (1.9%); Other: 3 (5.8%); White: 38 (73.1%) | African American: 9 (19.6%); Hispanic: 1 (2.2%); Other: 3 (6.5%); White: 33 (71.7%) | African American: 1 (16.7%); White: 5 (83.3%) |
| Female Pre-Puberty (Year 4) | N | 52 | 46 | 6 |
| Age, mean ± SD (years) | 6.1 ± 0.5 | 6.1 ± 0.5 | 6.3 ± 0.6 |
| BMI, mean ± SD (kg/m²) | 19.3 ± 3.5 | 19.2 ± 3.7 | 20.2 ± 2.1 |
| Sex, n (%) | Female: 52 (100.0%) | Female: 46 (100.0%) | Female: 6 (100.0%) |
| Race/Ethnicity, n (%) | African American: 10 (19.2%); Hispanic: 1 (1.9%); Other: 3 (5.8%); White: 38 (73.1%) | African American: 9 (19.6%); Hispanic: 1 (2.2%); Other: 3 (6.5%); White: 33 (71.7%) | African American: 1 (16.7%); White: 5 (83.3%) |
| Female Post-Puberty (Baseline) | N | 82 | 63 | 19 |
| Age, mean ± SD (years) | 11.3 ± 0.8 | 11.2 ± 0.8 | 11.4 ± 0.8 |
| BMI, mean ± SD (kg/m²) | 20.3 ± 4.7 | 20.2 ± 4.7 | 20.5 ± 4.7 |
| Sex, n (%) | Female: 82 (100.0%) | Female: 63 (100.0%) | Female: 19 (100.0%) |
| Race/Ethnicity, n (%) | African American: 14 (17.1%); Hispanic: 8 (9.8%); Other: 8 (9.8%); White: 52 (63.4%) | African American: 9 (14.3%); Hispanic: 6 (9.5%); Other: 6 (9.5%); White: 42 (66.7%) | African American: 5 (26.3%); Hispanic: 2 (10.5%); Other: 2 (10.5%); White: 10 (52.6%) |
| Female Post-Puberty (Year 4) | N | 85 | 66 | 19 |
| Age, mean ± SD (years) | 11.3 ± 0.8 | 11.2 ± 0.8 | 11.4 ± 0.8 |
| BMI, mean ± SD (kg/m²) | 24.2 ± 5.7 | 24.2 ± 5.7 | 24.0 ± 5.7 |
| Sex, n (%) | Female: 85 (100.0%) | Female: 66 (100.0%) | Female: 19 (100.0%) |
| Race/Ethnicity, n (%) | African American: 15 (17.6%); Hispanic: 9 (10.6%); Other: 7 (8.2%); White: 54 (63.5%) | African American: 10 (15.2%); Hispanic: 6 (9.1%); Other: 6 (9.1%); White: 44 (66.7%) | African American: 5 (26.3%); Hispanic: 3 (15.8%); Other: 1 (5.3%); White: 10 (52.6%) |

| Sex | Metabolite | beta | SE | t | pvalue |
| --- | --- | --- | --- | --- | --- |
| Males | deoxycortisol | 0.089323841 | 0.133243402 | 0.67038097 | 0.503007705 |
| alphahydroxyprogesterone | 0.217505574 | 0.167065952 | 1.30191443 | 0.193706266 |
| hydroxycorticosterone | 0.001515643 | 0.133405243 | 0.0113612 | 0.990941021 |
| aldosterone | -0.017630896 | 0.280507217 | -0.0628536 | 0.949914936 |
| androstenedione | -0.060625096 | 0.16836914 | -0.3600725 | 0.718985858 |
| corticosterone | 0.07333506 | 0.11454582 | 0.64022467 | 0.522398677 |
| cortisol | 0.013808361 | 0.116964589 | 0.11805591 | 0.906083517 |
| cortisone | 0.135404883 | 0.101098554 | 1.3393355 | 0.181233564 |
| **deoxycorticosterone** | **0.244036135** | **0.106248509** | **2.29684292** | **0.022151543** |
| dehydroepiandrosteronesulfate | 0.052187524 | 0.043279304 | 1.20583095 | 0.228606306 |
| estradiol | 0.16880066 | 0.41079913 | 0.41090803 | 0.681363365 |
| estrone | 0.352631303 | 0.233394068 | 1.51088374 | 0.13161965 |
| estronesulfate | -0.326773019 | 0.282547901 | -1.1565225 | 0.248168224 |
| pregnenolonesulfate | 0.124506209 | 0.084115688 | 1.48017822 | 0.139624845 |
| **progesterone** | **0.301563564** | **0.144619682** | **2.085218** | **0.03769267** |
| testosterone | -0.172543318 | 0.242660137 | -0.7110493 | 0.47747441 |
| Females | deoxycortisol | -0.035232263 | 0.125344131 | -0.2810843 | 0.778876419 |
| alphahydroxyprogesterone | 0.048871506 | 0.216390345 | 0.22584883 | 0.821502061 |
| hydroxycorticosterone | -0.041533981 | 0.166128828 | -0.2500107 | 0.80278278 |
| aldosterone | -0.141425282 | 0.301044372 | -0.4697822 | 0.638916902 |
| androstenedione | 0.126399618 | 0.166162983 | 0.76069661 | 0.447549476 |
| corticosterone | -0.083563661 | 0.132218153 | -0.6320135 | 0.527950991 |
| cortisol | 0.026870797 | 0.118421425 | 0.22690824 | 0.820679056 |
| **cortisone** | **0.213009484** | **0.107662635** | **1.97849036** | **0.048962347** |
| deoxycorticosterone | 0.06293653 | 0.126246379 | 0.49852147 | 0.618551381 |
| dehydroepiandrosteronesulfate | -0.054517436 | 0.087901272 | -0.6202121 | 0.535678574 |
| estradiol | -0.046326181 | 0.287055032 | -0.1613843 | 0.871920026 |
| estrone | -0.181018081 | 0.255609224 | -0.7081829 | 0.479486204 |
| estronesulfate | -0.314719132 | 0.295454355 | -1.0652039 | 0.287803208 |
| **pregnenolonesulfate** | **-0.241176904** | **0.120678059** | **-1.9985149** | **0.046735201** |
| progesterone | 0.213767412 | 0.764346698 | 0.27967336 | 0.779957532 |
| testosterone | 0.009567604 | 0.218269242 | 0.04383395 | 0.965071475 |

**Supplementary Table 2:** Results from testing the homogeneity of slopes assumption for ANCOVA models, stratified by sex. The interaction term (ICS x baseline metabolite) tests whether the baseline-endpoint relationship differs between treatment groups. Significant interactions (p < 0.05, bolded) indicate heterogenous slopes, violating the standard ANCOVA assumption. Non-significant interactions indicate homogenous slopes satisfying ANCOVA assumption.

**Supplementary Figure 1. Longitudinal associations between ICS exposure and circulating steroid metabolites in children with asthma.** (A–B) Results from the combined cohort analysis. (A) Main effect (i.e., effect at preintervention) of ICS exposure on circulating steroid metabolite levels estimated from a linear mixed model with metabolite at preintervention adjusted for. (B) Interaction effect between ICS use and time (baseline to Year 4), representing differential metabolite trajectories between ICS users and non-users, adjusted for baseline metabolite levels. (C-D) Sex-stratified analyses showing the corresponding effects in males and females. (C) Main effect of ICS exposure. (D) ICS × time interaction representing differential longitudinal changes. ** indicates p < 0.05; * indicates p < 0.10.

**
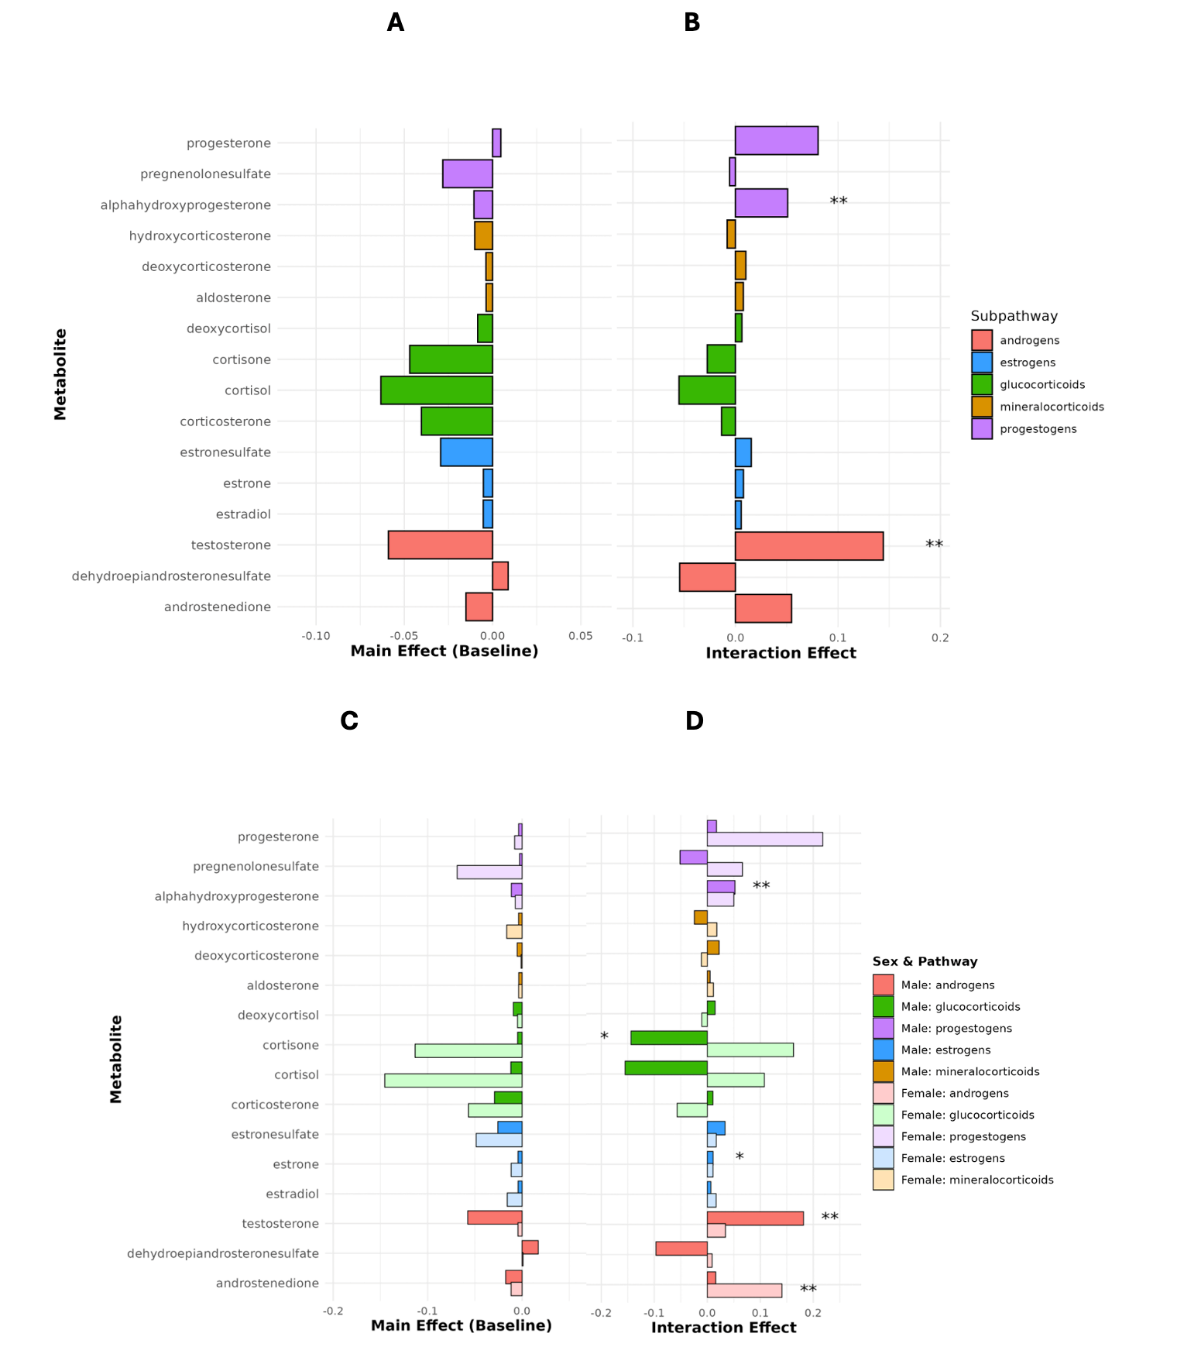
**

**Supplementary Figure 2. Longitudinal and endpoint associations between ICS exposure and circulating steroid metabolites in males with asthma.** (A&B) Mixed model results at pre-puberty without adjusting for baseline metabolite. (C&D) Mixed model results at pre-puberty, adjusted for baseline metabolite. Main effect (i.e., effect at baseline) represents the effect of ICS exposure on circulating steroid metabolite levels. Interaction effect (baseline to Year 4) represents differential metabolite trajectories between ICS users and non-users. (E) Endpoint associations at Year 4 estimated using ANCOVA models. ** indicates p < 0.05; * indicates p < 0.10.

**
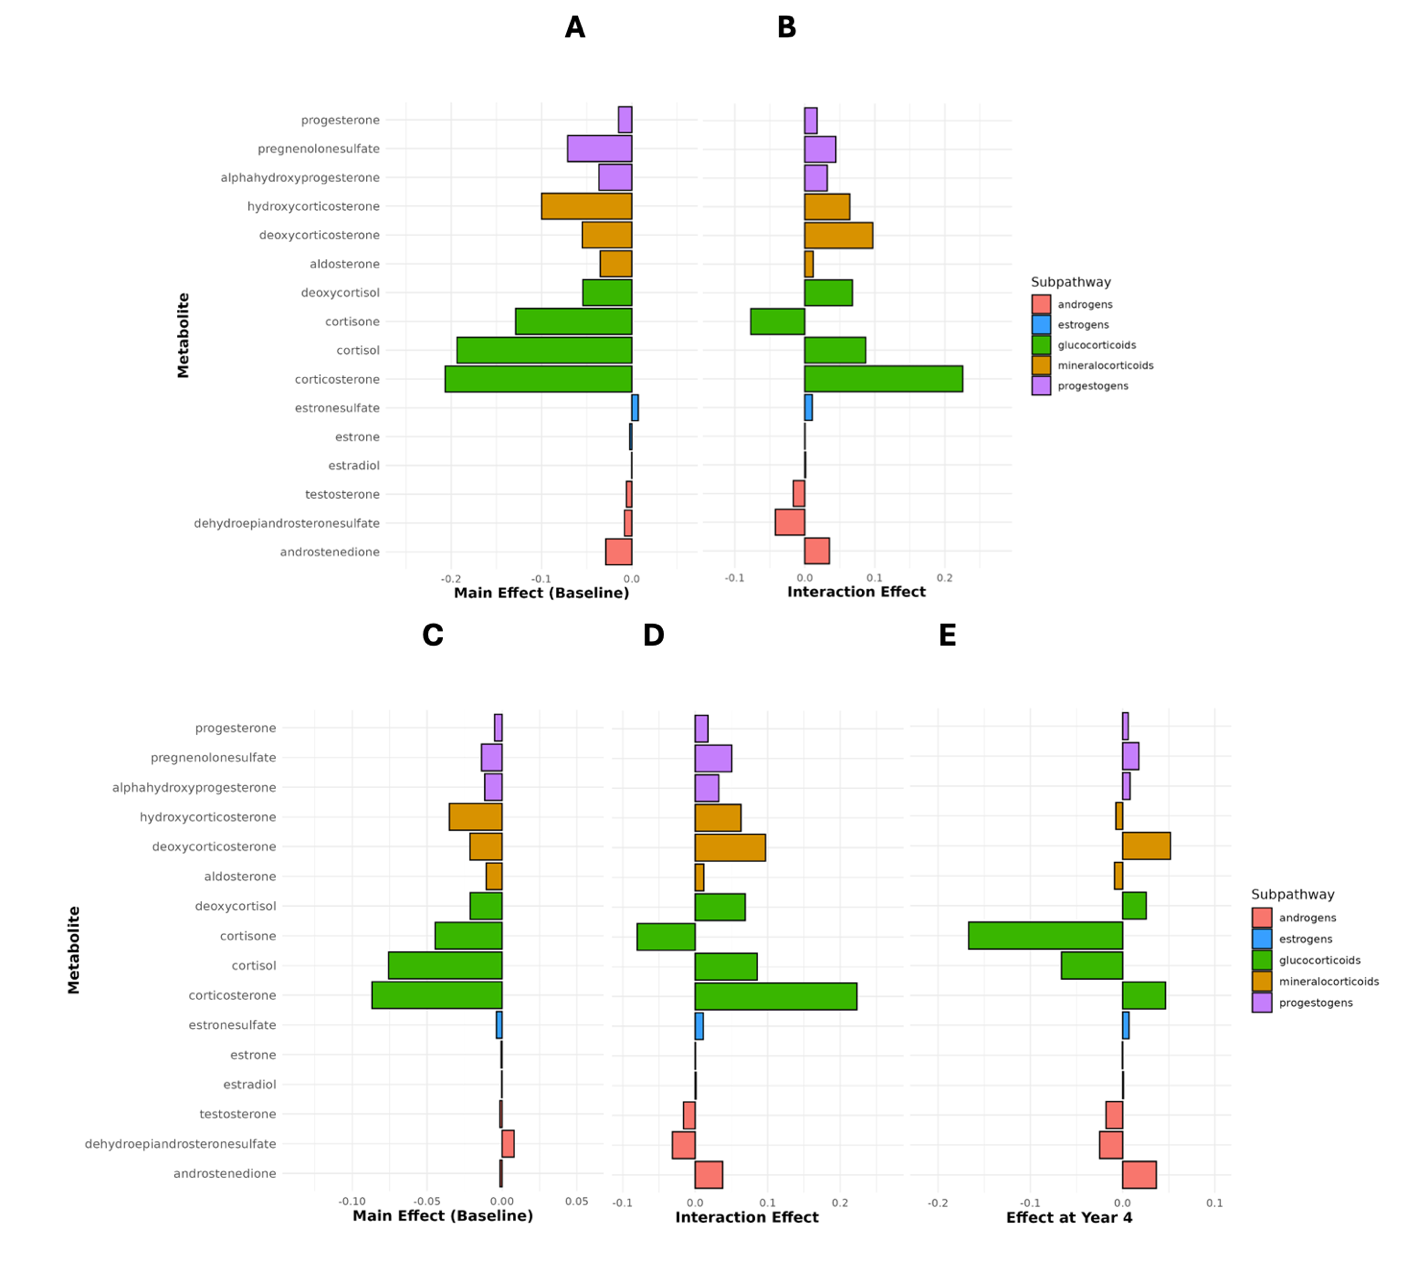
**

**Supplementary Figure 3. Longitudinal and endpoint associations between ICS exposure and circulating steroid metabolites in females with asthma.** (A&B) Mixed model results at post-puberty without adjusting for baseline metabolite. (C&D) Mixed model results at post-puberty, adjusted for baseline metabolite. Main effect (i.e., effect at baseline) represents the effect of ICS exposure on circulating steroid metabolite levels. Interaction effect (baseline to Year 4) represents differential metabolite trajectories between ICS users and non-users. (E) Endpoint associations at Year 4 estimated using ANCOVA models. ** indicates p < 0.05; * indicates p < 0.10.

**
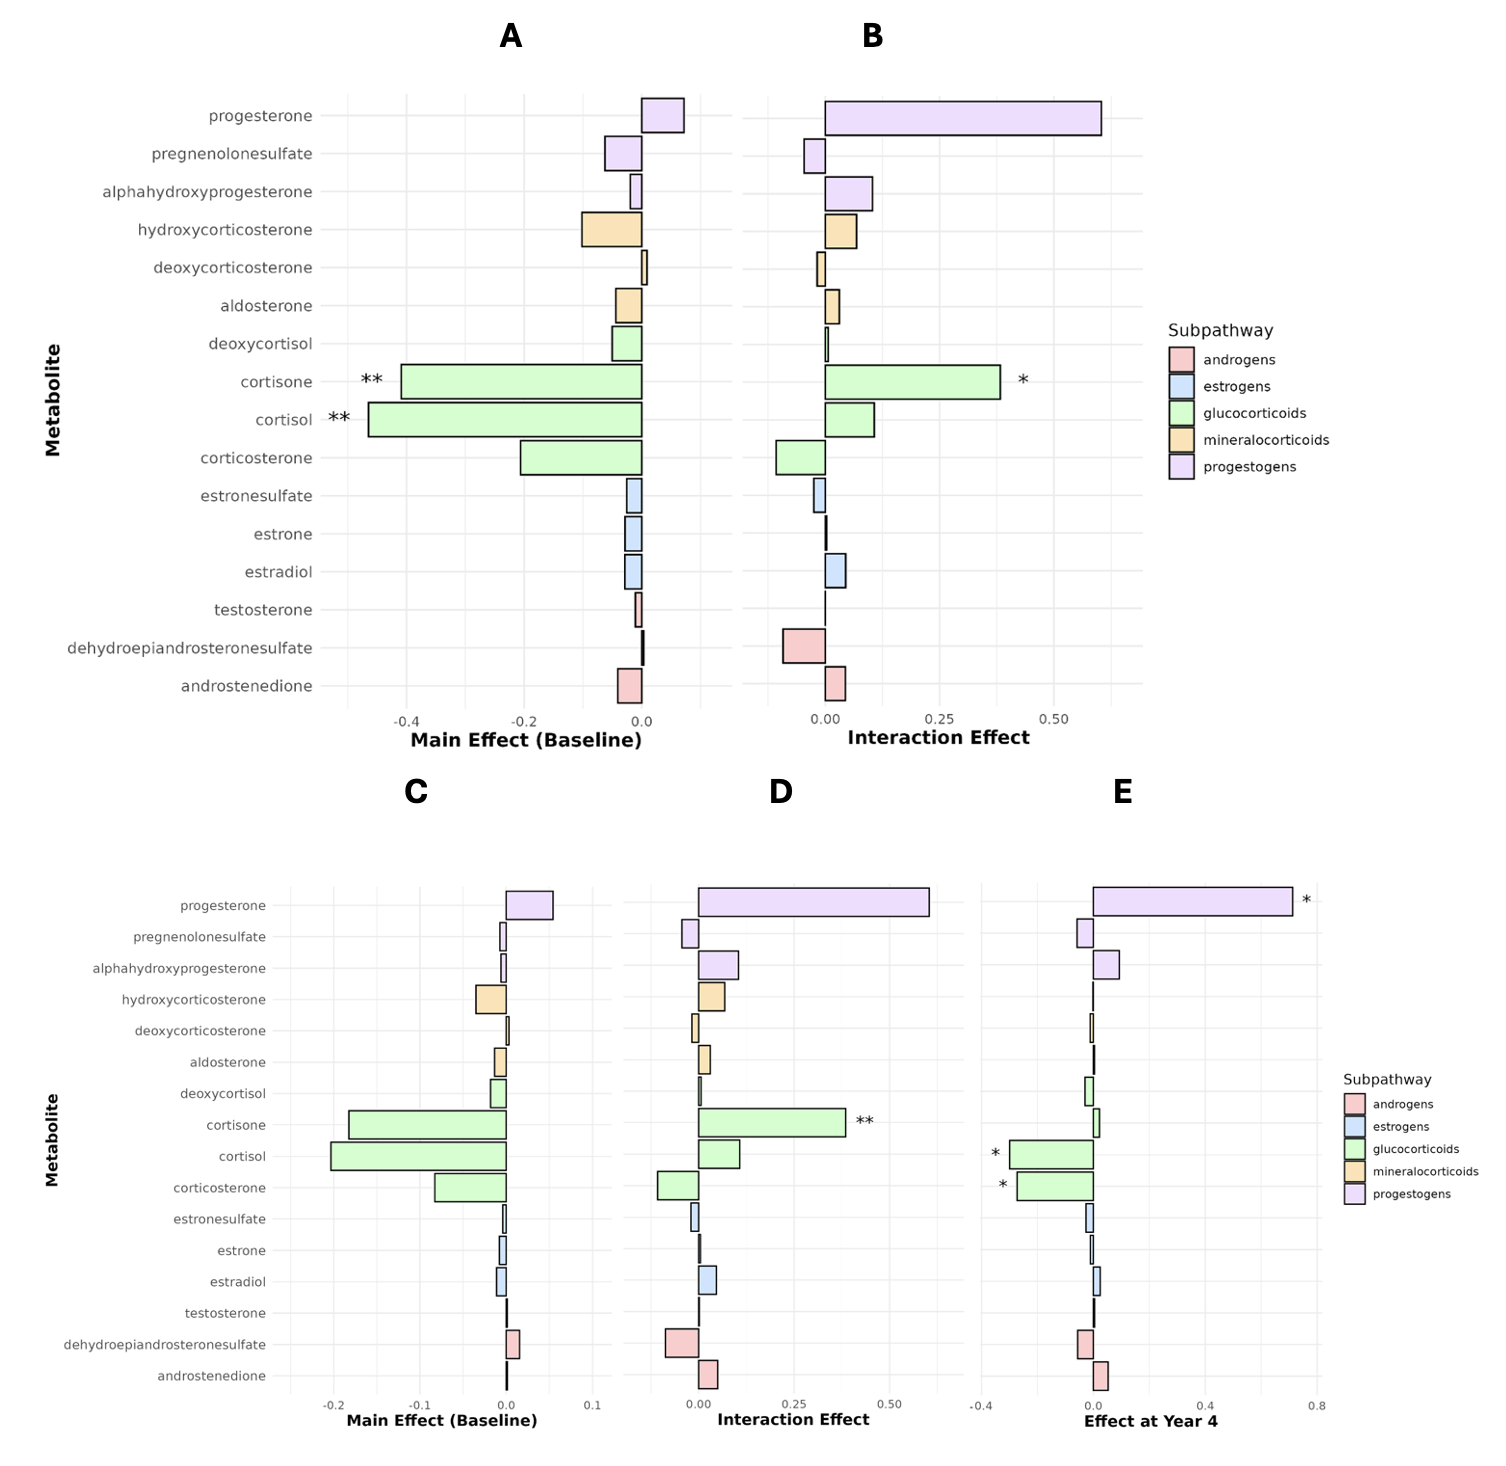
**
